## Corrections

Characterization of binding site-catalytic site signalling in cystein proteinases by using substrate derived two-protonic-state reactivity probes.

By K. BROCKLEHURST, D. KOWLESSUR, G. PATEL, W. TEMPLETON,  
E. THOMAS and F. WILLENBROCK

Volume 14 (1986)

p. 1225, right-hand column, the second sentence of the third paragraph should read: Specific interaction of this peptide bond with the enzyme backbone may permit or facilitate general acid catalysis of the expulsion of the leaving group in the acylation process of the catalytic act.

The molecular mass and trimeric nature of dichloroamphenicol transacetylase

By S. E. HARDING, A. J. ROWE and W. V. SHAW

Volume 15 (1987)

p. 513, left-hand column, the sentence beginning on line 13 of paragraph 2 should read: A 12 mm cell was employed, the initial loading concentration  $c^0$  was approx. 2 mg/ml, and the value of the partial specific volume used was 0.736 ml/g evaluated experimentally (Kratky *et al.*, 1973) and also from the amino acid composition.
